# Supplementary material
Source: HighWire-hosted journal article supplement (https://bmjopen.bmj.com/content/14/8/e083181)
Supplement: inline-supplementary-material-1 [file inline-supplementary-material-1.pdf]

Appendix I: Search strategy

Preliminary search in May 2023

| MEDLINE via PubMed |                                                                                                                                                                                                                     |                   |
|--------------------|---------------------------------------------------------------------------------------------------------------------------------------------------------------------------------------------------------------------|-------------------|
| Search             | Query                                                                                                                                                                                                               | Records retrieved |
| #1                 | ((((education, nursing[MeSH Terms]) OR (education, nursing, associate[MeSH Terms])) OR (students, nursing[MeSH Terms])) OR (faculty, nursing[MeSH Terms])) OR (mentors[MeSH Terms])) OR (preceptorship[MeSH Terms]) | 104,677           |
| #2                 | ((((((language) OR (linguistic*)) OR (multilingu*)) OR ("second language")) OR ("foreign language")) OR ("additional language"))                                                                                    | 410,106           |
| #3                 | #1 AND #2                                                                                                                                                                                                           | 3,078             |

| CINAHL via EBSCO |                                                                                                                                                                                                                                  |                   |
|------------------|----------------------------------------------------------------------------------------------------------------------------------------------------------------------------------------------------------------------------------|-------------------|
| Search           | Query                                                                                                                                                                                                                            | Records retrieved |
| #1               | ("nurs* student*" OR "nurs* assistan*" OR mentor* OR preceptorship OR "nursing faculty" OR "nursing education") AND (multilingu* OR "second language" OR "foreign language" OR "additional language" OR linguistic* OR language) | 2,237             |

| ERIC via EBSCO |                                                                                                                                                                                                                                  |                   |
|----------------|----------------------------------------------------------------------------------------------------------------------------------------------------------------------------------------------------------------------------------|-------------------|
| Search         | Query                                                                                                                                                                                                                            | Records retrieved |
| #1             | ("nurs* student*" OR "nurs* assistan*" OR mentor* OR preceptorship OR "nursing faculty" OR "nursing education") AND (multilingu* OR "second language" OR "foreign language" OR "additional language" OR linguistic* OR language) | 2,251             |
