# Supplementary material
Source: HighWire-hosted journal article supplement (https://bmjopen.bmj.com/content/14/8/e083181)
Supplement: inline-supplementary-material-2 [file inline-supplementary-material-2.pdf]

Appendix II: Data extraction instrument

|                                                                                                                                                                                                 |                                                                                                                                                                              |
|-------------------------------------------------------------------------------------------------------------------------------------------------------------------------------------------------|------------------------------------------------------------------------------------------------------------------------------------------------------------------------------|
| Source details                                                                                                                                                                                  | Authors/year<br><br>Country<br><br>Document type<br><br>Participants/sample<br><br>Design<br><br>Purpose/aim/research questions<br><br>Methods<br><br>Theoretical frameworks |
| Research question 1:<br><br>How do non-native speaking nursing students experience their undergraduate nursing education?                                                                       | Feelings<br><br>Challenges/barriers<br><br>Facilitators/motivators<br><br>Situations/scenarios                                                                               |
| Research question 2:<br><br>How do faculty and preceptors experience the teaching of non-native speaking nursing students?                                                                      | Feelings<br><br>Challenges/barriers<br><br>Facilitators/motivators<br><br>Situations/scenarios<br><br>Exams/material                                                         |
| Research question 3:<br><br>What language needs and requirements are described or can be derived for non-native speaking nursing students to participate in an undergraduate nursing education? | Language needs<br><br>Language requirements                                                                                                                                  |
| Research question 4:<br><br>What assessments, scales or tools are reported to assess language abilities before, during and at the end of the undergraduate nursing programs?                    | Name/aim<br><br>Number of items<br><br>Type of questions/tasks                                                                                                               |
| Research question 5:<br><br>Which recommendations and/or activities for language support are described before and during undergraduate nursing education?                                       | Recommendations<br><br>Support activities/interventions                                                                                                                      |
